# Supplementary material for: Steam reforming of methane over ordered mesoporous Ni–Mg–Al oxides
Source: Royal Society of Chemistry journal article supplement (doi:10.1039/b910071g), 2009-01-01
Supplement: b910071g.pdf [file b910071g.pdf]

## Electronic supplementary information (ESI)

### Steam reforming of methane over ordered mesoporous Ni-Mg-Al oxides

Weihua Shen, Kenta Komatsubara, Takashi Hagiya, Akihiro Yoshida and Shuichi Naito\*

Department of Material and Life Chemistry, Kanagawa University, 3-27-1, Rokkakubashi, Kanagawa-ku, Yokohama, 221-8686, Japan, Fax +81-45-413-9770, E-mail: naitos01@kanagawa-u.ac.jp

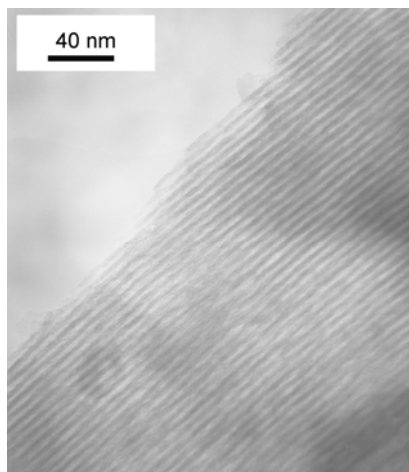

Fig. S1 TEM image of as-prepared Ni/20MgMA.

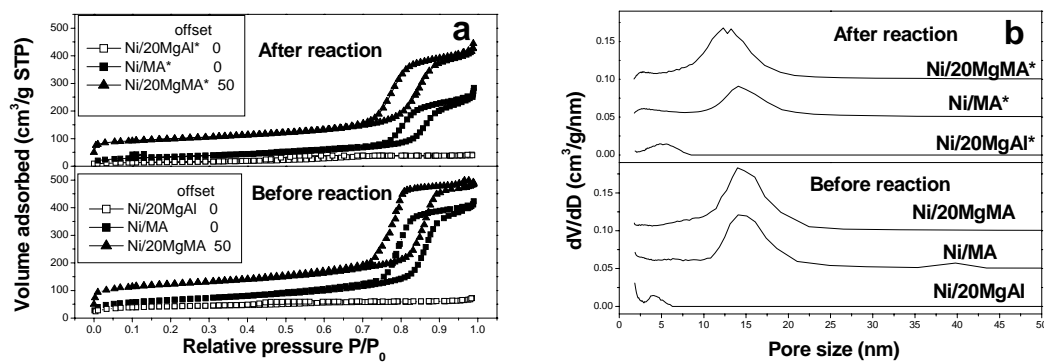

Fig. S2 N<sub>2</sub> sorption isotherms (a) and pore size distributions (b) of as-prepared and spent Ni/MA, Ni/20MgMA and Ni/20MgAl. The pore distributions were calculated from adsorption branches.

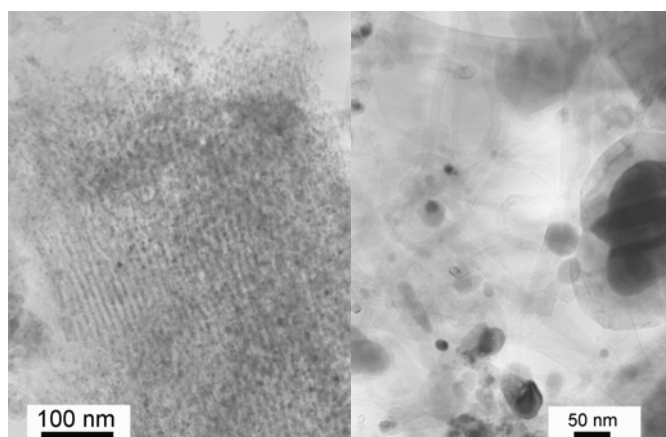

**Fig S3** TEM images of spent Ni/MA (left) and carbon nanotube formed on Ni/20MgAl (right).

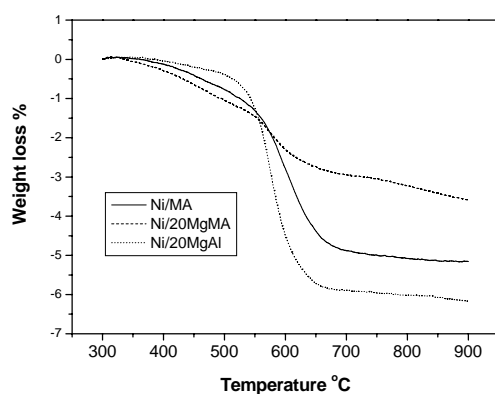

**Fig. S4** TG profiles of spent Ni/MA, Ni/20MgMA and Ni/20MgAl.

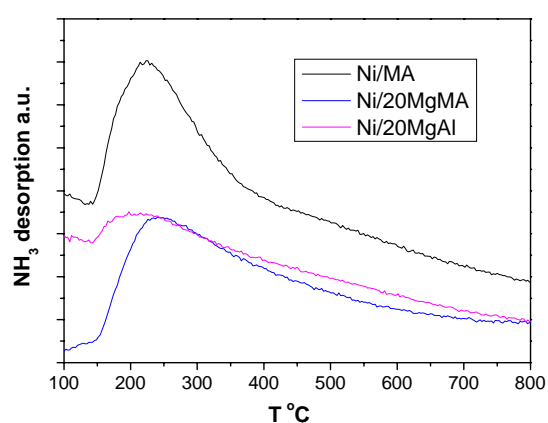

**Fig S5** Profiles of  $\text{NH}_3$ -TPD. 100 mg of samples were pretreated in 10%  $\text{H}_2$  with the temperature increasing rate 20 °C/min to 800 °C and maintained at 800 °C for 20 min. After cooling down to 100 °C in helium, ammonia adsorption was carried out for 30 min. Then helium was purged for 2 hrs. The  $\text{NH}_3$ -TPD was conducted by increasing the temperature from 100 °C to 800 °C with heating rate of 10 °C/min under 100 mL/min He flow, and out gas was analyzed by online mass spectroscopy.
